# Supplementary material for: SAW Resonators and Filters Based on Sc0.43Al0.57N on Single Crystal and Polycrystalline Diamond
Source: MDPI journal article supplement (doi:10.3390/mi13071061), 2022-06-30
Supplement: s1 [file s1]

*Supplementary information*

## **SAW Resonators and Filters Based on $\text{Sc}_{0.43}\text{Al}_{0.57}\text{N}$ on Single Crystal and Polycrystalline Diamond**

**SEM:**

SEM inspection of the grounded reflector and IDT of the SAW filter.

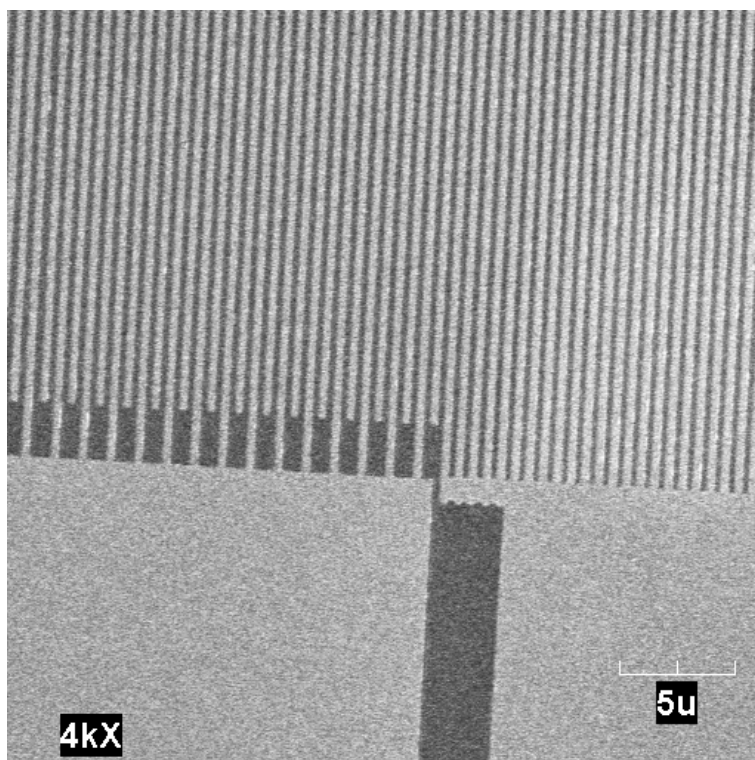

**Figure S1.** SEM inspection of the SAW filter IDT and ground reflector

**RBS:**

Rutherford Backscattering Spectrometry (RBS) (Figure S2) was carried out with a 3080 keV  $\text{He}^{++}$  beam. Measuring at this energy enhances the oxygen signal from the  $\text{ScAlN}$  layer because of the resonance in the  $\text{He-O}$  cross section at 3.05 MeV. The angle between the ion beam and the sample surface normal was  $7^\circ$  and the angle between the surface normal and the detector was  $3^\circ$ , so that the backscattering angle was  $170^\circ$ . Concentrations and thicknesses are obtained by comparing the experimental data with simulations done with the SIMNRA program (<https://mam.home.ipp.mpg.de/index.html>).

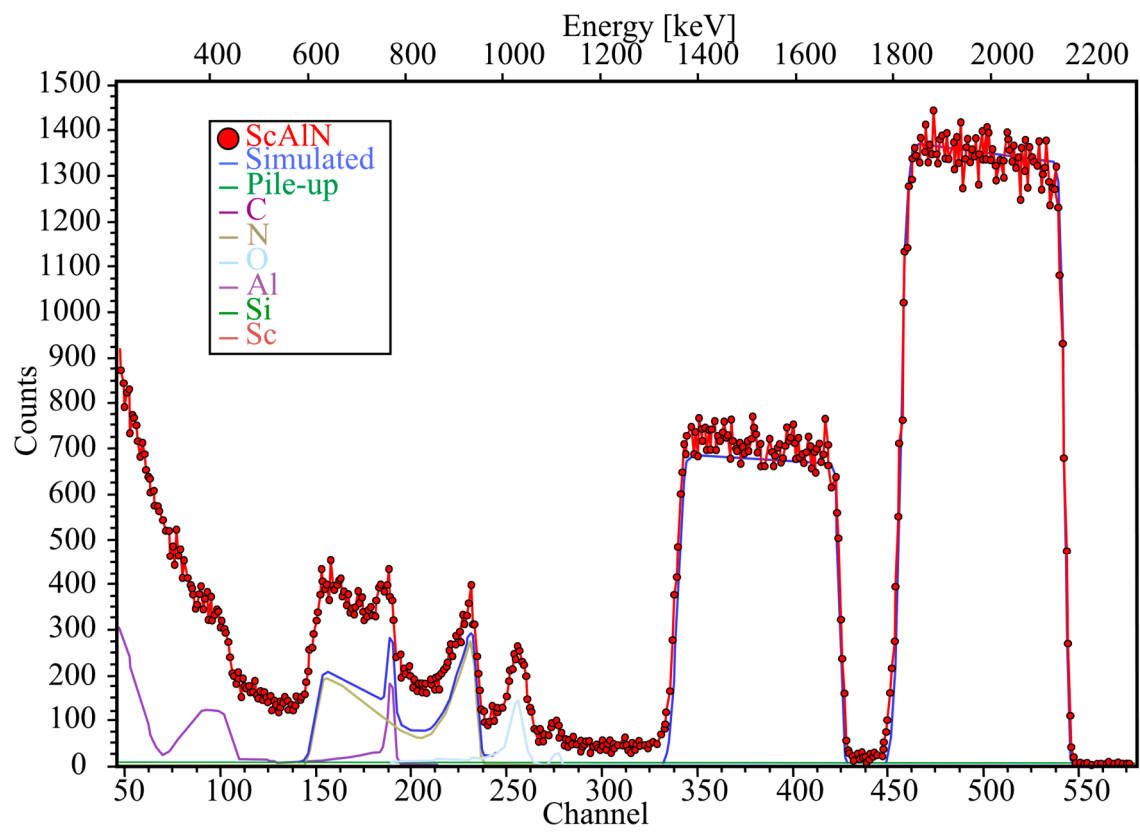

**Figure S2.** RBS spectra of a  $Sc_{0.43}Al_{0.57}N$  thin film
